# Supplementary material for: Structural and electrical properties of lanthanum copper oxide epitaxial thin films with different domain morphologies
Source: Royal Society of Chemistry journal article supplement (doi:10.1039/c8ce00777b), 2018-01-01
Supplement: c8ce00777b1.pdf [file c8ce00777b1.pdf]

## **Supplementary Information**

# **Structural and electrical properties of lanthanum copper oxide epitaxial thin films with different domain morphologies**

Tomoya Onozuka,<sup>a</sup> Akira Chikamatsu,<sup>\*a</sup> Yasushi Hirose<sup>a</sup> and Tetsuya Hasegawa<sup>a</sup>

<sup>a</sup>*Department of Chemistry, The University of Tokyo, 7-3-1 Hongo, Bunkyo-ku, Tokyo 113-0033, Japan*

\*E-mail: [chikamatsu@chem.s.u-tokyo.ac.jp](mailto:chikamatsu@chem.s.u-tokyo.ac.jp)

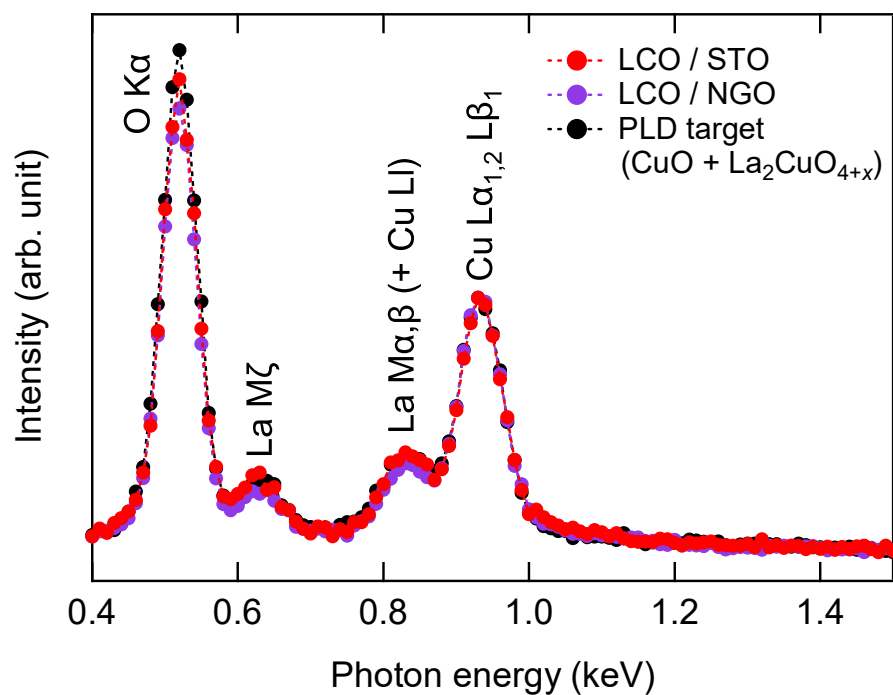

**Figure S1.** EDS spectra of the LCO films on STO (100) and NGO (110) substrates cooled under 30 Pa and the PLD target (mixture of CuO and  $\text{La}_2\text{CuO}_{4+x}$ ). The spectra were normalized by the Cu  $\text{L}\alpha_{1,2}\text{L}\beta_1$  peaks.

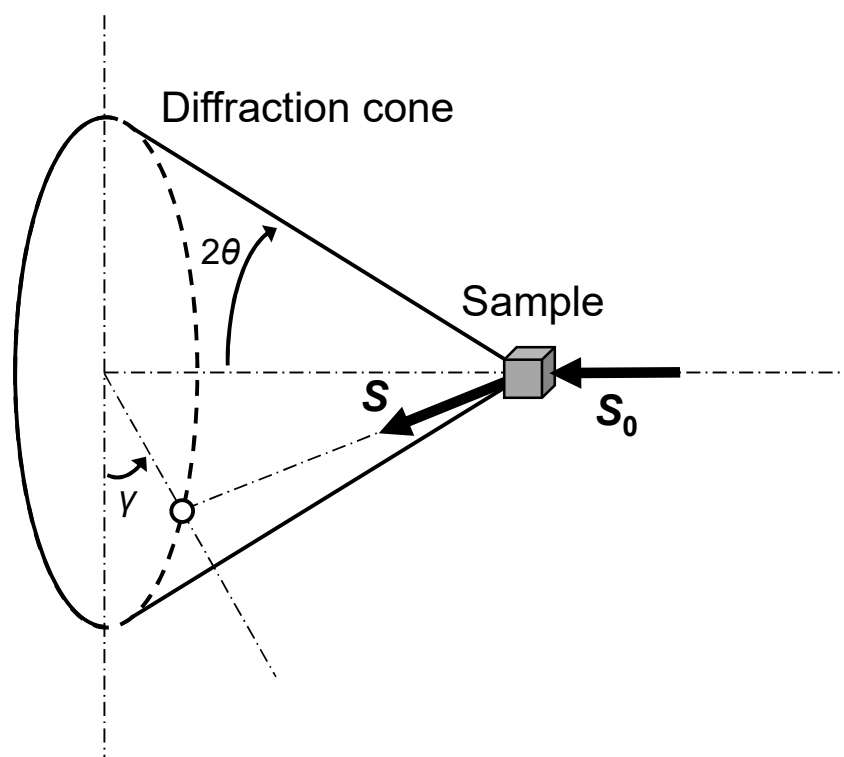

**Figure S2.** Diffraction cone and the definition of diffraction angles  $\gamma$  and  $2\theta$ .  $S_0$  and  $S$  denote the direction of the incident and diffracted X-rays, respectively. Ref: B.B. He, *Powder Diffraction*, 2014, **29**, 113.
